# Supplementary material
Source: PubMed Central journal article supplement (PMC9185044)
Supplement: ajtr0014-2779-f17.pdf [file ajtr0014-2779-f17.pdf]

## Pyroptosis-related IncRNA risk model in BRCA

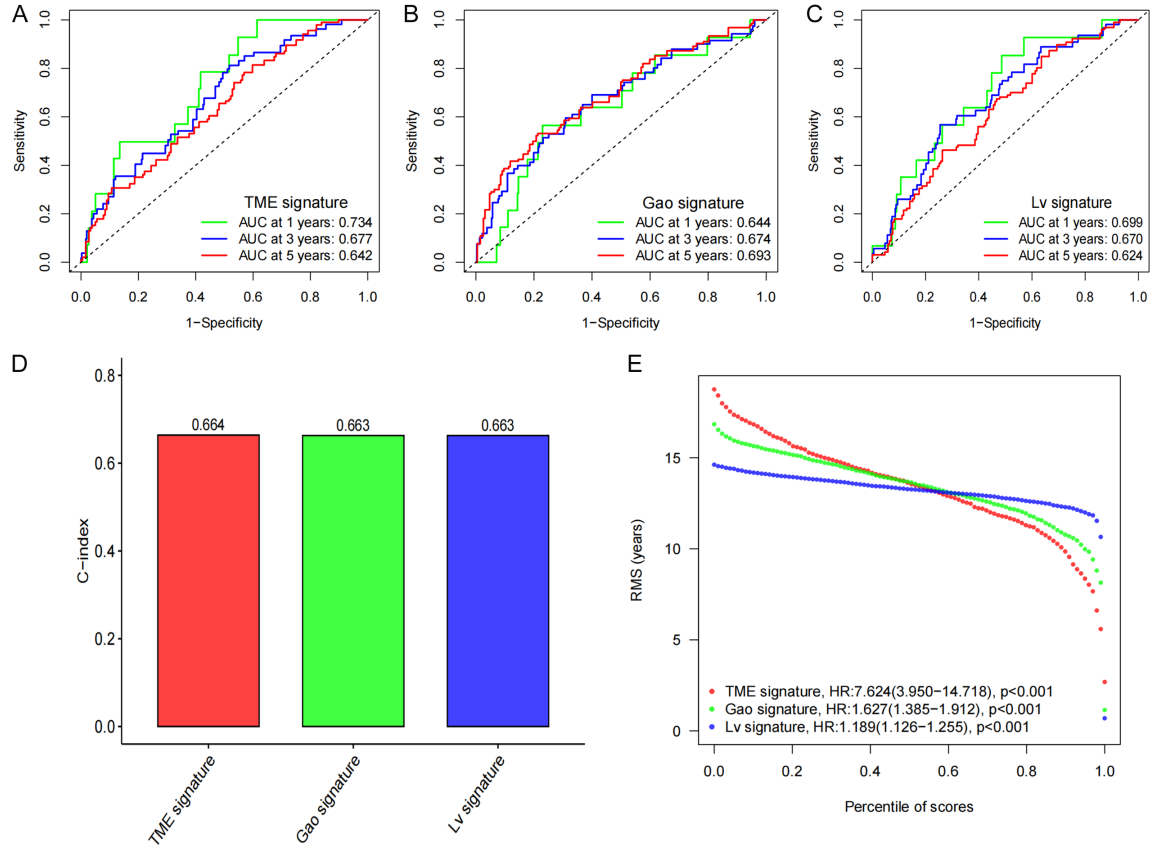

**Supplementary Figure 1.** Comparison of pyroptosis-related IncRNAs Signature with other breast cancer pyroptosis models. A: Our pyroptosis models. B: Gao Signature. C: Lv Signature. D, E: C-index and RMS index in three models.
